# Supplementary material for: Assessing protein energy wasting in a Malaysian haemodialysis population using self-reported appetite rating: a cross-sectional study
Source: Springer Nature journal article supplement (doi:10.1186/s12882-015-0073-x), 2015-07-06
Supplement: MOESM1 [file 9741648]

### Additional file 1: Sensitivity, specificity and accuracy of PEW diagnostic criteria according to appetite categories

| PEW criteria <sup>a</sup>  | Diminished appetite (n=84) <sup>b</sup> | Normal appetite (n=121) <sup>b</sup> | Sensitivity (%) | Specificity (%) | Accuracy (%) |
|----------------------------|-----------------------------------------|--------------------------------------|-----------------|-----------------|--------------|
| Serum albumin < 38 g/dL    | 45 (53.6)                               | 54 (44.6)                            | 45.5            | 63.2            | 54.6         |
| BMI < 23 kg/m <sup>2</sup> | 52 (61.9)                               | 54 (44.6)                            | 49.1            | 67.7            | 58.0         |
| MAMC < 10%                 | 51 (60.7)                               | 64 (52.9)                            | 44.3            | 63.3            | 52.7         |
| DEI < 25kcal/kg IBW        | 53 (63.1)                               | 80 (66.1)                            | 39.8            | 56.9            | 45.9         |
| PEW diagnosis              | 38 (45.2)                               | 41 (33.9)                            | 48.1            | 63.5            | 57.6         |

#### Footnotes:

Abbreviations: BMI = Body mass index; DEI = dietary energy intake; IBW = ideal body weight, MAMC = mid-arm muscle circumference; PEW = protein energy wasting

<sup>a</sup> PEW criteria and its cut-offs was provided by the International Society of Renal Nutrition and Metabolism (ISRNM) panel such as serum albumin <3.8 g per 100ml (bromocresol green method), BMI <23 kg/m<sup>2</sup>, reduced MAMC (reduction >10% in relation to 50<sup>th</sup> percentile of reference population) and unintentional low DEI <25kcal/kg per/day for at least 2 months [7].

<sup>b</sup>Data for appetite categories are presented as frequency (%)
